# Supplementary material
Source: PubMed Central journal article supplement (PMC6248104)
Supplement: jama-320-1793-s001.pdf [file jama-320-1793-s001.pdf]

## Supplementary Online Content

van Sloten TT, Tafflet M, Périer M-C, et al. Association of change in cardiovascular risk factors with incident cardiovascular events. *JAMA*. doi:10.1001/jama.2018.16975

**eTable 1.** Definition of cardiovascular health metrics according to the American Heart Association for ascertainment of cardiovascular health status

**eTable 2.** Characteristics of excluded and included study participants at baseline in 1985/88

**eTable 3.** Prevalence of individual cardiovascular health metrics at each wave of examination from 1985/88 up to 2015/2016

**eTable 4.** Time-varying Cox proportional hazard model for incident coronary heart disease and stroke as separate outcomes

**eTable 5.** Time-varying Cox proportional hazard model for cause-specific mortality (competing risk analysis)

**eTable 6.** Baseline characteristics of included and excluded study participants for the analysis of the change in cardiovascular health between 1985/88 and 1997/99

**eTable 7.** Baseline characteristics by pattern of change in cardiovascular health

**eTable 8.** Associations between 4 groups of cardiovascular health change as defined in the Framingham Offspring study and incident cardiovascular disease and all-cause mortality

**eTable 9.** Time-varying Cox proportional hazard model for incident cardiovascular disease and all-cause mortality – results using multiple imputations to account for missing values

**eTable 10.** Change in cardiovascular health status between 1985/88 and 1997/99 and association with subsequent incident cardiovascular disease and all-cause mortality – results using multiple imputations to account for missing values

**eTable 11.** Change in the level of individual cardiovascular health metrics between 1985/88 and 1997/99

**eTable 12.** Time-varying Cox proportional hazard models for the association between individual cardiovascular health metrics and incident cardiovascular disease and all-cause mortality

**eTable 13.** Association of change in the individual cardiovascular health metrics between 1985/88 and 1997/99 with subsequent incident cardiovascular disease events and all-cause mortality

**eFigure 1.** Summary of the statistical analysis design

**eFigure 2.** Distribution of the number of ideal cardiovascular health metrics at each wave in the total study population (A), by age group (B), by sex (C) and in white versus non-white participants (D)

**eFigure 3.** Distribution of the change in cardiovascular health between 1985/88 and 1997/99 in the total study population (n=6326) (A), in individuals aged <45 (n=3591) and ≥45 years (n=2735) (B), in women (n=1874) and men (n=4452) (C) and in white (n=5854) versus non-white participants (n=472) (D)

**eFigure 4.** Distribution of the change in the number of ideal cardiovascular health metrics between 1985/88 and 1997/99 in the total study population (n=6326) (A), in individuals aged <45 (n=3591) and ≥45 years (n=2735) (B), in women (n=1874) and men (n=4452) (C) and in white (n=5854) versus non-white participants (n=472) (D)

**eFigure 5.** Hazards ratios of incident cardiovascular disease and all-cause mortality for change in the number of ideal cardiovascular health metrics between 1985/88 and 1997/99.

**eFigure 6.** Heatmap of unadjusted incidence rates of cardiovascular disease (A) and all-cause mortality (B) by change in the number of ideal health metrics between 1985/88 and 1997/99 in the total study population

This supplementary material has been provided by the authors to give readers additional information about their work.

## 1 Online-Only Supplements

### 3 Association of change in cardiovascular risk factors with incident 4 cardiovascular events

5 Thomas T van Sloten<sup>1,2,3</sup>, MD, PhD, Muriel Tafflet<sup>1,2</sup>, MSc, Marie-Cécile Périer<sup>1,2</sup>, MSc, Aline  
6 Dugravot<sup>4,5</sup>, PhD, Rachel ED Climie<sup>1,2,6,7</sup>, PhD, Archana Singh-Manoux<sup>4,5</sup>, PhD, Jean-  
7 Philippe Empana<sup>1,2</sup>, MD, PhD

8 1. Université Paris Descartes, Sorbonne Paris Cité, Faculté de Médecine, Paris, France.

9 2. INSERM, UMR-S970, Paris Cardiovascular Research Center, Integrative Epidemiology of  
10 cardiovascular disease (Team 4), Paris, France.

11 3. Cardiovascular Research Institute Maastricht and Department of Internal Medicine, Maastricht  
12 University Medical Centre, Maastricht, the Netherlands

13 4. INSERM, U1018, Centre for Research in Epidemiology and Population Health, France

14 5. Department of Epidemiology and Public Health, University College London, UK

15 6. Menzies Institute for Medical Research, University of Tasmania, Hobart, Australia

16 7. Baker Heart and Diabetes Institute, Melbourne, Australia

### 18 Contents

19 eTable 1. Definition of cardiovascular health metrics according to the American Heart Association for  
20 ascertainment of cardiovascular health status

21 eTable 2. Characteristics of excluded and included study participants at baseline in 1985/88

22 eTable 3. Prevalence of individual cardiovascular health metrics at each wave of examination from  
23 1985/88 up to 2015/2016

24 eTable 4. Time-varying Cox proportional hazard model for incident coronary heart disease and stroke  
25 as separate outcomes

26 eTable 5. Time-varying Cox proportional hazard model for cause-specific mortality (competing risk  
27 analysis)

28 eTable 6. Baseline characteristics of included and excluded study participants for the analysis of the  
29 change in cardiovascular health between 1985/88 and 1997/99

30 eTable 7. Baseline characteristics by pattern of change in cardiovascular health

31 eTable 8. Associations between 4 groups of cardiovascular health change as defined in the  
32 Framingham Offspring study and incident cardiovascular disease and all-cause mortality

33 eTable 9. Time-varying Cox proportional hazard model for incident cardiovascular disease and all-  
34 cause mortality – results using multiple imputations to account for missing values

35 eTable 10. Change in cardiovascular health status between 1985/88 and 1997/99 and association with  
36 subsequent incident cardiovascular disease and all-cause mortality – results using multiple  
37 imputations to account for missing values

38 eTable 11. Change in the level of individual cardiovascular health metrics between 1985/88 and  
39 1997/99

40 eTable 12. Time-varying Cox proportional hazard models for the association between individual  
41 cardiovascular health metrics and incident cardiovascular disease and all-cause mortality

42 eTable 13. Association of change in the individual cardiovascular health metrics between 1985/88 and  
43 1997/99 with subsequent incident cardiovascular disease events and all-cause mortality

44 eFigure 1. Summary of the statistical analysis design

45 eFigure 2. Distribution of the number of ideal cardiovascular health metrics at each wave in the total  
46 study population (A), by age group (B), by sex (C) and in white versus non-white participants (D)

47 eFigure 3. Distribution of the change in cardiovascular health between 1985/88 and 1997/99 in the  
48 total study population (n=6326) (A), in individuals aged <45 (n=3591) and ≥45 years (n=2735) (B), in  
49 women (n=1874) and men (n=4452) (C) and in white (n=5854) versus non-white participants (n=472)  
50 (D).

51 eFigure 4. Distribution of the change in the number of ideal cardiovascular health metrics between  
52 1985/88 and 1997/99 in the total study population (n=6326) (A), in individuals aged <45 (n=3591) and  
53 ≥45 years (n=2735) (B), in women (n=1874) and men (n=4452) (C) and in white (n=5854) versus non-  
54 white participants (n=472) (D).

55 eFigure 5. Hazards ratios of incident cardiovascular disease and all-cause mortality for change in the  
56 number of ideal cardiovascular health metrics between 1985/88 and 1997/99.

57 eFigure 6. Heatmap of unadjusted incidence rates of cardiovascular disease (A) and all-cause  
58 mortality (B) by change in the number of ideal health metrics between 1985/88 and 1997/99 in the  
59 total study population

60 **eTable 1. Definition of cardiovascular health metrics according to the American**  
 61 **Heart Association for ascertainment of cardiovascular health status**

| Metric                                    | Recommended ideal level                                                                                                                                                                                                                                                                                                                                                                                                                                                                                                                                                                                                                                                                                                                  | Intermediate level                                                                                                                               | Poor level                                                                                                                                       |
|-------------------------------------------|------------------------------------------------------------------------------------------------------------------------------------------------------------------------------------------------------------------------------------------------------------------------------------------------------------------------------------------------------------------------------------------------------------------------------------------------------------------------------------------------------------------------------------------------------------------------------------------------------------------------------------------------------------------------------------------------------------------------------------------|--------------------------------------------------------------------------------------------------------------------------------------------------|--------------------------------------------------------------------------------------------------------------------------------------------------|
| <b>Smoking</b>                            | Never or quit $\geq 12$ months                                                                                                                                                                                                                                                                                                                                                                                                                                                                                                                                                                                                                                                                                                           | Quit $< 12$ months                                                                                                                               | Current smokers                                                                                                                                  |
| <b>Body mass index</b>                    | BMI $< 25$ kg/m <sup>2</sup>                                                                                                                                                                                                                                                                                                                                                                                                                                                                                                                                                                                                                                                                                                             | 25-29.9 kg/m <sup>2</sup>                                                                                                                        | $\geq 30$ kg/m <sup>2</sup>                                                                                                                      |
| <b>Physical activity<sup>a</sup></b>      | $\geq 75$ min/week of vigorous activity, $\geq 150$ min/week of moderate activity or a combination of the two                                                                                                                                                                                                                                                                                                                                                                                                                                                                                                                                                                                                                            | 1–74 min/week vigorous activity, 1–149 min/week moderate activity or a combination of the two                                                    | None                                                                                                                                             |
| <b>Healthy diet<sup>b</sup></b>           | At baseline (1985/88): $\geq 2$ optimal out of the following 3 items: 2 servings of a fruit and vegetable portion/day and fish consumption $\geq 3$ times/week.<br><br>At last follow-up examination (2015/16): $\geq 2$ optimal out of the following 3 items: $\geq 2$ servings of a fruit and vegetable portion/day and consumption of fiber-rich aliments content $\geq 3$ times/day<br><br>For all other examination rounds: $\geq 4$ optimal out of the following 5 items: $\geq 2$ servings of a fruit and vegetable portion/day, fish consumption $\geq 3$ times/week, consumption of fiber-rich aliments content $\geq 3$ times/day, sodium consumption $\leq 1500$ mg/day and $\leq 450$ kcal of sugar-sweetened beverages/week | At baseline and last-follow-up examination: 1 optimal out of the 3 items<br><br>For all other examination rounds: 2-3 optimal out of the 5 items | At baseline and last-follow-up examination: 0 optimal out of the 3 items<br><br>For all other examination rounds: 0-1 optimal out of the 5 items |
| <b>Blood pressure<sup>c</sup></b>         | $< 120/80$ mmHg, untreated                                                                                                                                                                                                                                                                                                                                                                                                                                                                                                                                                                                                                                                                                                               | $< 120/80$ mmHg on medications or 120-139/80-89 mmHg                                                                                             | $\geq 140/90$ mmHg                                                                                                                               |
| <b>Fasting plasma glucose<sup>d</sup></b> | $< 100$ mg/dL, untreated                                                                                                                                                                                                                                                                                                                                                                                                                                                                                                                                                                                                                                                                                                                 | 100 -126 mg/dL or $< 100$ mg/dL treated                                                                                                          | $> 126$ mg/dL                                                                                                                                    |
| <b>Total cholesterol<sup>d</sup></b>      | $< 200$ mg/dL, untreated                                                                                                                                                                                                                                                                                                                                                                                                                                                                                                                                                                                                                                                                                                                 | 200 -240 mg/dL or $< 200$ mg/dL treated                                                                                                          | $> 240$ mmol/L                                                                                                                                   |

62 <sup>a</sup> Physical activity was assessed using questions on frequency and duration of participation in mildly energetic (e.g., weeding,  
 63 general housework, bicycle repair), moderately energetic (e.g., dancing, cycling, leisurely swimming), and vigorous physical  
 64 activity (e.g., running, hard swimming, playing squash).<sup>1,2</sup>  
 65 <sup>b</sup> For the diet metric at baseline (1985/88), only the frequency consumption of fruits, vegetables and fish was reported, and at  
 66 last follow-up (2015/16) only the frequency consumption of fruits, vegetables and fibers was reported. At subsequent  
 67 examinations, the frequency consumption of the 5 AHA-recommended items was drawn from a validated 127-item food  
 68 frequency questionnaire (FFQ).<sup>3</sup>  
 69 <sup>c</sup> Systolic blood pressure was measured twice with a sphygmomanometer in the sitting position after 5 min rest, and the average  
 70 of the two readings was used in the present analyses. Participants reported their medications used in the previous 14 days;  
 71 responses were coded using the British National Formulary.<sup>4</sup>  
 72 <sup>d</sup> Fasting blood glucose and total cholesterol were measured using standardized methods. Participants reported their  
 73 medications used in the previous 14 days; responses were coded using the British National Formulary.<sup>4</sup> At baseline (1985/88),  
 74 however, only prevalent diabetes and antidiabetic medications were available.  
 75 SI conversion factor: To convert cholesterol to millimoles per liter, multiply by 0.0259.  
 76 SI conversion factor: To convert glucose to millimoles per liter, multiply by 0.0555.

77 **eTable 2. Characteristics of excluded and included study participants at**  
 78 **baseline in 1985/88**

|                                   | <b>Included<br/>(N=9256)</b> | <b>Excluded<br/>(N=1052)</b> | <b>Difference<br/>(95% confidence interval)</b> |
|-----------------------------------|------------------------------|------------------------------|-------------------------------------------------|
| Age, mean (SD), y                 | 44.77 (6.02)                 | 46.56 (6.11)                 | -1.79 (-2.18; -1.4)                             |
| Men, No. (%)                      | 6315 (68.23)                 | 580 (55.13)                  | 13.1 (8.89; 17.31)                              |
| Depression <sup>a</sup> , No. (%) | 1272 (13.74)                 | 159 (16.67)                  | -2.93 (-9.02; 3.16)                             |
| Education level, No. (%)          |                              |                              |                                                 |
| High school                       | 2368 (25.58)                 | 295 (28.04)                  | -2.46 (-7.88; 2.96)                             |
| College                           | 1744 (18.84)                 | 138 (13.12)                  | 5.72 (-0.2; 11.64)                              |
| Tertiary                          | 2933 (31.69)                 | 203 (19.30)                  | 12.39 (6.71; 18.07)                             |
| Occupation grade, No. (%)         |                              |                              |                                                 |
| Administrative                    | 2791 (30.15)                 | 237 (22.53)                  | 7.62 (2.04; 13.2)                               |
| Professional/executive            | 4538 (49.03)                 | 405 (38.50)                  | 10.53 (5.57; 15.49)                             |
| Clerical/support                  | 1927 (20.82)                 | 410 (38.97)                  | -18.15 (-23.21; -13.09)                         |
| Marital status, No. (%)           |                              |                              |                                                 |
| Married/cohabiting                | 6894 (74.48)                 | 714 (70.41)                  | 4.07 (0.57; 7.57)                               |
| Single                            | 1509 (16.30)                 | 181 (17.85)                  | -1.55 (-7.43; 4.33)                             |
| Divorced                          | 742 (8.02)                   | 91 (8.97)                    | -0.95 (-7.14; 5.24)                             |
| Widowed                           | 111 (1.20)                   | 28 (2.76)                    | -1.56 (-7.96; 4.84)                             |
| Race/ethnicity (white) , No. (%)  | 8389 (90.63)                 | 792 (82.50)                  | 8.13 (5.41; 10.85)                              |
| Family history, No. (%)           |                              |                              |                                                 |
| Stroke                            | 1609 (17.38)                 | 173 (20.72)                  | -3.34 (-9.66; 2.98)                             |
| Myocardial infarction             | 2492 (26.92)                 | 292 (33.41)                  | -6.49 (-12.17; -0.81)                           |

79 <sup>a</sup> Depressive symptoms were ascertained using the 30-item General Health Questionnaire.<sup>5</sup>

**eTable 3. Prevalence of individual cardiovascular health metrics at each wave of examination from 1985/88 up to 2015/2016**

| Examination round                                | 1985/88      | 1991/93      | 1997/99      | 2002/04      | 2007/09      | 2012/13      | 2015/16      |
|--------------------------------------------------|--------------|--------------|--------------|--------------|--------------|--------------|--------------|
| <b>Prevalence of individual metrics, No. (%)</b> | N=9256       | N=8972       | N=8539       | N=8014       | N=7363       | N=6795       | N=6334       |
| Smoking                                          |              |              |              |              |              |              |              |
| Poor                                             | 1672 (18.06) | 1537 (17.13) | 1221 (14.30) | 1014 (12.65) | 848 (11.52)  | 563 (8.29)   | 473 (7.47)   |
| Intermediate                                     | 387 (4.18)   | 197 (2.20)   | 227 (2.66)   | 144 (1.80)   | 148 (2.01)   | 654 (9.62)   | 722 (11.40)  |
| Ideal                                            | 7197 (77.75) | 7238 (80.67) | 7091 (83.04) | 6856 (85.55) | 6367 (86.47) | 5578 (82.09) | 5139 (81.13) |
| Body mass index                                  |              |              |              |              |              |              |              |
| Poor                                             | 606 (6.55)   | 824 (9.18)   | 1025 (12.00) | 1242 (15.50) | 1212 (16.46) | 1135 (16.70) | 1086 (17.15) |
| Intermediate                                     | 2946 (31.83) | 3289 (36.66) | 3414 (39.98) | 3407 (42.51) | 3032 (41.18) | 2787 (41.02) | 2572 (40.61) |
| Ideal                                            | 5704 (61.62) | 4859 (54.16) | 4100 (48.01) | 3365 (41.99) | 3119 (42.36) | 2873 (42.28) | 2676 (42.25) |
| Diet                                             |              |              |              |              |              |              |              |
| Poor                                             | 8298 (89.65) | 4404 (49.09) | 3874 (45.37) | 3390 (42.30) | 3017 (40.98) | 2429 (35.75) | 2243 (35.41) |
| Intermediate                                     | 871 (9.41)   | 4291 (47.83) | 4314 (50.52) | 4234 (52.83) | 3961 (53.80) | 3923 (57.73) | 2871 (45.33) |
| Ideal                                            | 87 (0.94)    | 277 (3.09)   | 351 (4.11)   | 390 (4.87)   | 385 (5.23)   | 443 (6.52)   | 1220 (19.26) |
| Physical activity                                |              |              |              |              |              |              |              |
| Poor                                             | 1350 (14.59) | 1522 (16.96) | 1241 (14.53) | 918 (11.45)  | 862 (11.71)  | 792 (11.66)  | 863 (13.62)  |
| Intermediate                                     | 4989 (53.90) | 4758 (53.03) | 4873 (57.07) | 4672 (58.30) | 4249 (57.71) | 3960 (58.28) | 3744 (59.11) |
| Ideal                                            | 2917 (31.51) | 2692 (30.00) | 2425 (28.40) | 2424 (30.25) | 2252 (30.59) | 2043 (30.07) | 1727 (27.27) |
| Blood pressure                                   |              |              |              |              |              |              |              |
| Poor                                             | 1612 (17.42) | 1575 (17.55) | 1742 (20.40) | 1794 (22.39) | 1473 (20.01) | 1534 (22.58) | 1435 (22.66) |
| Intermediate                                     | 4107 (44.37) | 4096 (45.65) | 3671 (42.99) | 3779 (47.15) | 3711 (50.40) | 3545 (52.17) | 3356 (52.98) |
| Ideal                                            | 3537 (38.21) | 3301 (36.79) | 3126 (36.61) | 2441 (30.46) | 2179 (29.59) | 1716 (25.25) | 1543 (24.36) |
| Total cholesterol                                |              |              |              |              |              |              |              |
| Poor                                             | 3326 (35.93) | 4817 (53.69) | 3398 (39.79) | 2819 (35.18) | 1999 (27.15) | 1682 (24.75) | 1352 (21.35) |
| Intermediate                                     | 3647 (39.40) | 2881 (32.11) | 3413 (39.97) | 3507 (43.76) | 3723 (50.56) | 3683 (54.20) | 3459 (54.61) |
| Ideal                                            | 2283 (24.67) | 1274 (14.20) | 1728 (20.24) | 1688 (21.06) | 1641 (22.29) | 1430 (21.04) | 1523 (24.04) |
| Fasting glucose                                  |              |              |              |              |              |              |              |
| Poor                                             | 80 (0.86)    | 168 (1.87)   | 252 (2.95)   | 376 (4.69)   | 406 (5.51)   | 414 (6.09)   | 453 (7.15)   |
| Intermediate                                     | 0            | 2598 (28.96) | 2652 (31.06) | 3462 (43.20) | 2819 (38.29) | 2840 (41.80) | 2618 (41.33) |
| Ideal                                            | 9176 (99.14) | 6206 (69.17) | 5635 (65.99) | 4176 (52.11) | 4138 (56.20) | 3541 (52.11) | 3263 (51.52) |

82 **eTable 4. Time-varying Cox proportional hazard model for incident coronary heart disease and stroke as separate**  
 83 **outcomes**

|                                                     | Incident coronary heart disease |                          |                        | Incident stroke |                          |                        |
|-----------------------------------------------------|---------------------------------|--------------------------|------------------------|-----------------|--------------------------|------------------------|
|                                                     | n/N                             | Unadjusted HR<br>(95%CI) | Adjusted HR<br>(95%CI) | n/N             | Unadjusted HR<br>(95%CI) | Adjusted HR<br>(95%CI) |
| <b>Cardiovascular health status</b>                 | 1757/9256                       |                          |                        | 295/9256        |                          |                        |
| Low (0-2 ideal metrics)                             |                                 | 1 (Ref)                  | 1 (Ref)                |                 | 1 (Ref)                  | 1 (Ref)                |
| Moderate (3-4 ideal metrics)                        |                                 | 0.69 (0.63; 0.76)        | 0.71 (0.65; 0.79)      |                 | 0.74 (0.58; 0.93)        | 0.77 (0.60; 0.98)      |
| High (5-7 ideal metrics)                            |                                 | 0.44 (0.35; 0.55)        | 0.46 (0.36; 0.58)      |                 | 0.54 (0.31; 0.94)        | 0.58 (0.33; 1.01)      |
| <b>Per additional ideal metric</b>                  | 1757/9256                       | 0.81 (0.78; 0.85)        | 0.83 (0.79; 0.86)      | 295/9256        | 0.83 (0.75; 0.91)        | 0.85 (0.77; 0.93)      |
| <b>Per one-point increase in 14-point CVH score</b> | 1757/9256                       | 0.86 (0.84; 0.88)        | 0.86 (0.84; 0.88)      | 295/9256        | 0.88 (0.84; 0.93)        | 0.89 (0.84; 0.95)      |

84 Hazard ratios and 95% confidence intervals were estimated by Cox proportional hazard model stratified by year of birth (5-year intervals) and using age as the time scale over a median follow-up of  
 85 29.5 (interquartile range 25.2 to 30.4) years for CVD starting from baseline. Cardiovascular health status, per additional ideal metric and per one-point increase in the 14-point CVH score were  
 86 included as time-varying variables. The linearity assumption of the model per additional ideal metric and per one point increase in 14-point CVH score was evaluated by comparing the Akaike  
 87 information criterion of a linear model with a quadratic and a cubic model. Multivariable hazards ratios were adjusted sex, race/ethnicity, depression, education, occupation and family history of  
 88 cardiovascular disease at baseline. For the 141 participants who had both events, follow-up was censored at the date of first event.  
 89 HR stands for hazard ratio; CI for confidence interval; CVD for cardiovascular disease; and CVH for cardiovascular health.  
 90

91 **eTable 5. Time-varying Cox proportional hazard model for cause-specific mortality (competing risk analysis)**

|                                                     | Cause of death | n/N      | Unadjusted subHRs (95%CI) | Adjusted subHRs (95%CI) |
|-----------------------------------------------------|----------------|----------|---------------------------|-------------------------|
| <b>Cardiovascular health status</b>                 |                |          |                           |                         |
| Low (0-2 ideal metrics)                             | CVD            | 408/9256 | 1 (Ref)                   | 1 (Ref)                 |
| Moderate (3-4 ideal metrics)                        |                |          | 0.59 (0.48; 0.73)         | 0.62 (0.50; 0.76)       |
| High (5-7 ideal metrics)                            |                |          | 0.28 (0.15; 0.52)         | 0.30 (0.16; 0.56)       |
| <b>Cancer</b>                                       |                |          |                           |                         |
| Low (0-2 ideal metrics)                             | Cancer         | 748/9256 | 1 (Ref)                   | 1 (Ref)                 |
| Moderate (3-4 ideal metrics)                        |                |          | 0.79 (0.68; 0.91)         | 0.77 (0.66; 0.90)       |
| High (5-7 ideal metrics)                            |                |          | 0.99 (0.74; 1.30)         | 0.96 (0.72; 1.28)       |
| <b>Other causes</b>                                 |                |          |                           |                         |
| Low (0-2 ideal metrics)                             | Other causes   | 501/9256 | 1 (Ref)                   | 1 (Ref)                 |
| Moderate (3-4 ideal metrics)                        |                |          | 0.66 (0.55; 0.80)         | 0.67 (0.56; 0.81)       |
| High (5-7 ideal metrics)                            |                |          | 0.56 (0.37; 0.86)         | 0.58 (0.38; 0.89)       |
| <b>Per additional ideal metric</b>                  |                |          |                           |                         |
|                                                     | CVD            | 408/9256 | 0.73 (0.67; 0.80)         | 0.75 (0.68; 0.82)       |
|                                                     | Cancer         | 748/9256 | 0.91 (0.85; 0.97)         | 0.90 (0.85; 0.97)       |
|                                                     | Other causes   | 501/9256 | 0.83 (0.77; 0.89)         | 0.84 (0.77; 0.90)       |
| <b>Per one-point increase in 14-point CVH score</b> |                |          |                           |                         |
|                                                     | CVD            | 408/9256 | 0.80 (0.76; 0.84)         | 0.80 (0.76; 0.84)       |
|                                                     | Cancer         | 748/9256 | 0.92 (0.88; 0.95)         | 0.91 (0.88; 0.95)       |
|                                                     | Other causes   | 501/9256 | 0.84 (0.81; 0.88)         | 0.85 (0.81; 0.88)       |

92 Subdistribution hazard ratios (subHRs) and 95% confidence intervals were estimated by Cox proportional hazard model stratified by year of birth (5-year intervals) using the Fine and Gray<sup>6</sup> method  
 93 for competing risk over a median follow-up 30.2 (interquartile range 29.6 to 31.1) years for mortality starting from baseline. Cardiovascular health status, per additional ideal metric and per one-point  
 94 increase in the 14-point CVH score were included as time-varying variables. The linearity assumption of the model per additional ideal metric and per one-point  
 95 increase in the 14-point CVH score were evaluated by comparing the Akaike information criterion of a linear model with a quadratic and a cubic model. Multivariable hazards ratios were adjusted sex, race/ethnicity, depression, education,  
 96 occupation and family history of cardiovascular disease at baseline.

97 SubHRs stands for subdistribution hazard ratios; CI for confidence interval; CVD for cardiovascular disease; and CVH for cardiovascular health.

98



**eTable 6. Baseline characteristics of included and excluded study participants for the analysis of change in cardiovascular health status between 1985/88 and 1997/99**

|                                       | Included     | Excluded <sup>a</sup> |                                                     |                                           | P-value <sup>b</sup> |
|---------------------------------------|--------------|-----------------------|-----------------------------------------------------|-------------------------------------------|----------------------|
|                                       |              | All                   | Exclusion due to death or CVD event within interval | Exclusion due to drop-out or missing data |                      |
| <b>Baseline characteristics</b>       | N=6326       | N=2930                | N=716                                               | N=2214                                    |                      |
| Age, mean (SD), y                     | 44.47 (5.93) | 45.41 (6.15)          | 47.79 (5.73)                                        | 44.64 (6.08)                              | <.0001               |
| Men, No. (%)                          | 4452 (70.38) | 1863 (63.58)          | 504 (70.39)                                         | 1359 (61.38)                              | <.0001               |
| Depression <sup>c</sup> , No. (%)     | 838 (13.25)  | 434 (14.81)           | 102 (14.25)                                         | 332 (15.00)                               | .04                  |
| Education level, No. (%)              |              |                       |                                                     |                                           |                      |
| High school                           | 1465 (23.16) | 903 (30.82)           | 213 (29.75)                                         | 690 (31.17)                               | <.0001               |
| College                               | 1185 (18.73) | 559 (19.08)           | 141 (19.69)                                         | 418 (18.88)                               |                      |
| Tertiary                              | 2110 (33.35) | 823 (28.09)           | 189 (26.40)                                         | 634 (28.64)                               |                      |
| Occupation grade, No. (%)             |              |                       |                                                     |                                           |                      |
| Administrative                        | 2106 (33.29) | 685 (23.38)           | 196 (27.37)                                         | 489 (22.09)                               | <.0001               |
| Professional/executive                | 3189 (50.41) | 1349 (46.04)          | 327 (45.67)                                         | 1022 (46.16)                              |                      |
| Clerical/support                      | 1031 (16.30) | 896 (30.58)           | 193 (26.96)                                         | 703 (31.75)                               |                      |
| Marital status, No. (%)               |              |                       |                                                     |                                           |                      |
| Married/cohabiting                    | 4797 (75.83) | 2097 (71.57)          | 535 (74.72)                                         | 1562 (70.55)                              | <.0001               |
| Single                                | 997 (15.76)  | 512 (17.47)           | 116 (16.20)                                         | 396 (17.89)                               |                      |
| Divorced                              | 464 (7.33)   | 278 (9.49)            | 59 (8.24)                                           | 219 (9.89)                                |                      |
| Widowed                               | 68 (1.07)    | 43 (1.47)             | 6 (0.84)                                            | 37 (1.67)                                 |                      |
| Race/ethnicity (white), No. (%)       | 5854 (92.54) | 2535 (86.52)          | 617 (86.17)                                         | 1918 (86.63)                              | <.0001               |
| Family history, No. (%)               |              |                       |                                                     |                                           |                      |
| Stroke                                | 1077 (17.02) | 532 (18.16)           | 155 (21.65)                                         | 377 (17.03)                               | .18                  |
| Myocardial infarction                 | 1688 (26.68) | 804 (27.44)           | 245 (34.22)                                         | 559 (25.25)                               | .45                  |
| <b>Baseline cardiovascular health</b> |              |                       |                                                     |                                           |                      |
| Cardiovascular health status, No. (%) |              |                       |                                                     |                                           |                      |
| Low                                   | 1301 (20.57) | 876 (29.90)           | 253 (35.34)                                         | 623 (28.14)                               | <.0001               |
| Moderate                              | 3974 (62.82) | 1716 (58.57)          | 413 (57.68)                                         | 1303 (58.85)                              |                      |
| High                                  | 1051 (16.61) | 338 (11.54)           | 50 (6.98)                                           | 288 (13.01)                               |                      |

101  
102  
103  
104  
105

|                                         | Included           | Excluded <sup>a</sup> |                                        |                                           | P-value <sup>b</sup> |
|-----------------------------------------|--------------------|-----------------------|----------------------------------------|-------------------------------------------|----------------------|
|                                         |                    | All                   | Exclusion due to event within interval | Exclusion due to drop-out or missing data |                      |
|                                         | N=6326             | N=2930                | N=716                                  | N=2214                                    |                      |
| Number of ideal metrics, median (q1-q3) | 3.00 (3.00; 4.00)  | 3.00 (2.00; 4.00)     | 3.00 (2.00; 4.00)                      | 3.00 (2.00; 4.00)                         | <.0001               |
| 14-point CVH score, median (q1-q3)      | 9.00 (8.00; 10.00) | 8.00 (7.00; 9.00)     | 8.00 (6.00; 9.00)                      | 8.00 (7.00; 10.00)                        | <.0001               |

<sup>a</sup> Excluded participants are comprised of those who died in the interval (n=248), those who had a CVD event in the interval (n=468), those who dropped out (n=924) and those with incomplete CVH metrics (n=1290).

<sup>b</sup> P-value for contrast between included and excluded participants, derived from Pearson, chi-square and t-test where appropriate.

<sup>c</sup> Depressive symptoms were ascertained using the 30-item General Health Questionnaire.<sup>5</sup>

CVD stands for cardiovascular disease; q stands for quartile; and CVH for cardiovascular health.

106 **eTable 7. Baseline characteristics by pattern of change in cardiovascular health**

| Pattern of change                 | Low-Low      | Low-Mod      | Low-High     | Mod-Low      | Mod-Mod      | Mod-High     | High-Low     | High-Mod     | High-High    |
|-----------------------------------|--------------|--------------|--------------|--------------|--------------|--------------|--------------|--------------|--------------|
|                                   | N=852        | N=430        | N=19         | N=1141       | N=2463       | N=370        | N=120        | N=586        | N=345        |
| Age, mean (SD), y                 | 45.45 (5.88) | 45.41 (5.95) | 45.28 (6.52) | 44.73 (5.83) | 44.66 (5.96) | 44.08 (6.20) | 43.00 (5.57) | 43.03 (5.67) | 41.95 (5.17) |
| Men, No. (%)                      | 646 (75.82)  | 316 (73.49)  | 11 (57.89)   | 820 (71.87)  | 1717 (69.71) | 252 (68.11)  | 85 (70.83)   | 377 (64.33)  | 228 (66.09)  |
| Depression <sup>a</sup> , No. (%) | 111 (13.03)  | 50 (11.63)   | 0            | 165 (14.46)  | 324 (13.15)  | 49 (13.24)   | 18 (15.00)   | 71 (12.12)   | 50 (14.49)   |
| Education level, No. (%)          |              |              |              |              |              |              |              |              |              |
| High school                       | 226 (26.53)  | 103 (23.95)  | 3 (15.79)    | 292 (25.59)  | 567 (23.02)  | 56 (15.14)   | 28 (23.33)   | 133 (22.70)  | 57 (16.52)   |
| College                           | 182 (21.36)  | 81 (18.84)   | 5 (26.32)    | 206 (18.05)  | 451 (18.31)  | 64 (17.30)   | 26 (21.67)   | 105 (17.92)  | 65 (18.84)   |
| Tertiary                          | 227 (26.64)  | 137 (31.86)  | 6 (31.58)    | 381 (33.39)  | 792 (32.16)  | 149 (40.27)  | 39 (32.50)   | 231 (39.42)  | 148 (42.90)  |
| Occupation, No. (%)               |              |              |              |              |              |              |              |              |              |
| Administrative                    | 250 (29.34)  | 126 (29.30)  | 6 (31.58)    | 357 (31.29)  | 870 (35.32)  | 142 (38.38)  | 31 (25.83)   | 187 (31.91)  | 137 (39.71)  |
| Professional-executive            | 436 (51.17)  | 221 (51.40)  | 10 (52.63)   | 574 (50.31)  | 1215 (49.33) | 189 (51.08)  | 68 (56.67)   | 302 (51.54)  | 174 (50.43)  |
| Clerical/support                  | 166 (19.48)  | 83 (19.30)   | 3 (15.79)    | 210 (18.40)  | 378 (15.35)  | 39 (10.54)   | 21 (17.50)   | 97 (16.55)   | 34 (9.86)    |
| Marital status, No. (%)           |              |              |              |              |              |              |              |              |              |
| Married/cohabiting                | 643 (75.47)  | 327 (76.05)  | 16 (84.21)   | 862 (75.55)  | 1868 (75.84) | 280 (75.68)  | 95 (79.17)   | 455 (77.65)  | 251 (72.75)  |
| Single                            | 125 (14.67)  | 62 (14.42)   | 2 (10.53)    | 173 (15.16)  | 409 (16.61)  | 58 (15.68)   | 15 (12.50)   | 83 (14.16)   | 70 (20.29)   |
| Divorced                          | 68 (7.98)    | 38 (8.84)    | 1 (5.26)     | 86 (7.54)    | 165 (6.70)   | 29 (7.84)    | 10 (8.33)    | 45 (7.68)    | 22 (6.38)    |
| Widowed                           | 16 (1.88)    | 3 (0.70)     | 0            | 20 (1.75)    | 21 (0.85)    | 3 (0.81)     | 0            | 3 (0.51)     | 2 (0.58)     |
| Race/ethnicity: white, No. (%)    | 766 (89.91)  | 393 (91.40)  | 17 (89.47)   | 1046 (91.67) | 2300 (93.38) | 351 (94.86)  | 110 (91.67)  | 544 (92.83)  | 327 (94.78)  |
| Family history, No. (%)           |              |              |              |              |              |              |              |              |              |
| Stroke, No. (%)                   | 161 (18.90)  | 69 (16.05)   | 3 (15.79)    | 221 (19.37)  | 408 (16.57)  | 58 (15.68)   | 23 (19.17)   | 85 (14.51)   | 49 (14.20)   |
| MI, No. (%)                       | 280 (32.86)  | 115 (26.74)  | 6 (31.58)    | 272 (23.84)  | 653 (26.51)  | 91 (24.59)   | 39 (32.50)   | 144 (24.57)  | 88 (25.51)   |

Low stands for low cardiovascular health; mod for moderate cardiovascular health; high for high cardiovascular health; MI for myocardial infarction; CVD for cardiovascular disease

<sup>a</sup> Depressive symptoms were ascertained using the 30-item General Health Questionnaire.<sup>5</sup>

107  
108

109 **eTable 8. Associations between 4 groups of change in cardiovascular health as**  
 110 **defined in the Framingham study and incident cardiovascular disease and all-**  
 111 **cause mortality**

| Change in CVH status <sup>a</sup>      | n/N              | Adjusted hazard ratio<br>(95% confidence intervals) <sup>b</sup> |
|----------------------------------------|------------------|------------------------------------------------------------------|
|                                        |                  | High-High as reference                                           |
| <b>Incident cardiovascular disease</b> |                  |                                                                  |
|                                        | <b>1114/6326</b> |                                                                  |
| Low-Low                                | 238/874          | 1.94 (1.66; 2.26)                                                |
| Low-high                               | 136/609          | 1.38 (1.14; 1.67)                                                |
| High-low                               | 168/812          | 1.50 (1.26; 1.78)                                                |
| High-high                              | 572/4031         | 1 (Ref)                                                          |
| <b>All-cause mortality</b>             |                  |                                                                  |
|                                        | <b>846/6326</b>  |                                                                  |
| Low-Low                                | 194/874          | 2.04 (1.71; 2.42)                                                |
| Low-high                               | 102/609          | 1.36 (1.09; 1.69)                                                |
| High-low                               | 130/812          | 1.57 (1.28; 1.91)                                                |
| High-high                              | 420/4031         | 1 (Ref)                                                          |

112 Change in cardiovascular health status was computed over a median time interval of 10.4 (range 3.8 to 13.3) years in  
 113 participants free of cardiovascular disease within this time interval.

114 <sup>a</sup> The 4 groups of change in CVH were defined as high-high (those with 14-point CVH score  $\geq 8$  at baseline and last score of  $\geq 8$ ;  
 115 reference category), high-low ( $\geq 8$  baseline and  $\leq 7$  last), low-high ( $\leq 7$  baseline and  $\geq 8$  last) and low-low ( $\leq 7$  baseline and  $\leq 7$  last)  
 116 as used in the Framingham Offspring Study.

117 <sup>b</sup> Hazard ratios and 95% confidence intervals were estimated by Cox proportional hazard model. All models are stratified by  
 118 year of birth (5-year intervals) and using age as the time scale on a remaining median follow-up time of 18.9 (interquartile range  
 119 17.8 to 19.3) years for cardiovascular disease and 19.7 (interquartile range 18.9 to 19.8) years for mortality. Hazards ratios were  
 120 adjusted for sex, race/ethnicity, depression, education, occupation and family history of cardiovascular disease at baseline.  
 121 CVH stands for cardiovascular health

122 **eTable 9. Time-varying Cox proportional hazard model for incident**  
 123 **cardiovascular disease and all-cause mortality – results using multiple**  
 124 **imputations to account for missing values**

|                                                                     | Cardiovascular disease |                        | All-cause mortality |                        |
|---------------------------------------------------------------------|------------------------|------------------------|---------------------|------------------------|
|                                                                     | n/N                    | Adjusted HR<br>(95%CI) | n/N                 | Adjusted HR<br>(95%CI) |
| <b>Cardiovascular health status<sup>a</sup></b>                     | 2295/10186             |                        | 1879/10186          |                        |
| Low (0-2 ideal metrics)                                             |                        | 1 (Ref)                |                     | 1 (Ref)                |
| Moderate (3-4 ideal metrics)                                        |                        | 0.74 (0.66; 0.82)      |                     | 0.67 (0.59; 0.76)      |
| Ideal (5-7 ideal metrics)                                           |                        | 0.48 (0.38; 0.60)      |                     | 0.59 (0.46; 0.76)      |
| <b>Per additional ideal metric<sup>a</sup></b>                      | 2295/10186             | 0.84 (0.80; 0.87)      | 1879/10186          | 0.81 (0.77; 0.85)      |
| <b>Per one-point increase in the 14-point CVH score<sup>a</sup></b> | 2295/10186             | 0.87 (0.85; 0.90)      | 1879/10186          | 0.84 (0.82; 0.87)      |

125 Hazard ratios and 95% confidence intervals were estimated by Cox proportional hazard models stratified by year of birth (5-year  
 126 intervals) and using age as the time scale over 29.5 (interquartile range 25.2 to 30.4) years for CVD and 30.2 (interquartile  
 127 range 29.6 to 31.1) years for mortality starting from baseline.

128 <sup>a</sup> Cardiovascular health status, per additional ideal metric and per one point increase in the 14-point CVH score, were included  
 129 as time-varying variables. Hazards ratios were adjusted for sex, race/ethnicity, depression, education, occupation and family  
 130 history of cardiovascular disease at baseline. Missing CVH metrics and covariates were imputed by multiple imputation using  
 131 fully conditional specification method under SAS MI procedure, n=10 imputations.

132 HR stands for hazard ratio; CI for confidence interval; and CVD for cardiovascular disease.

133  
134

**eTable 10. Change in cardiovascular health status between 1985/88 and 1997/99 and association with subsequent incident cardiovascular disease and all-cause mortality – results using multiple imputations to account for missing values**

|                                                               | Cardiovascular disease         |                     | All-cause mortality            |                     |
|---------------------------------------------------------------|--------------------------------|---------------------|--------------------------------|---------------------|
|                                                               | n <sup>a</sup> /N <sup>a</sup> | Adjusted HR (95%CI) | n <sup>a</sup> /N <sup>a</sup> | Adjusted HR (95%CI) |
| <b>Change in CVH status</b>                                   | 1692/9368                      |                     | 1426/9368                      |                     |
| Low-Low                                                       | 408.6/1586.3                   | 1 (Ref)             | 384.2/1586.3                   | 1 (Ref)             |
| Low-Moderate                                                  | 114.6/549.5                    | 0.81 (0.63; 1.04)   | 115.5/549.5                    | 0.86 (0.67; 1.09)   |
| Low-High                                                      | 0.9/23.3                       | -                   | 3.4/23.3                       | 0.57 (0.17; 1.90)   |
| Moderate-Low                                                  | 481.8/2273.6                   | 0.87 (0.75; 1.00)   | 357.7/2273.6                   | 0.68 (0.58; 0.79)   |
| Moderate-Moderate                                             | 464.4/3059.9                   | 0.59 (0.51; 0.69)   | 398/3059.9                     | 0.55 (0.47; 0.64)   |
| Moderate-High                                                 | 40.7/438.6                     | 0.36 (0.25; 0.52)   | 42.3/438.6                     | 0.41 (0.29; 0.58)   |
| High-Low                                                      | 39.3/271.0                     | 0.63 (0.44; 0.92)   | 22.3/271.0                     | 0.43 (0.26; 0.71)   |
| High-Moderate                                                 | 100.7/793.9                    | 0.54 (0.43; 0.68)   | 74.5/793.9                     | 0.45 (0.34; 0.59)   |
| High-High                                                     | 41.0/371.9                     | 0.52 (0.37; 0.74)   | 28.1/371.9                     | 0.43 (0.29; 0.66)   |
| <b>Change in number of ideal metrics</b>                      |                                |                     |                                |                     |
| Per one additional ideal metric <sup>b</sup>                  | 1692/9368                      | 0.85 (0.81; 0.89)   | 1426/9368                      | 0.90 (0.85; 0.95)   |
| <b>Change in 14-point CVH score</b>                           |                                |                     |                                |                     |
| Per one point increase in the 14-point CVH score <sup>c</sup> | 1692/9368                      | 0.88 (0.85; 0.91)   | 1426/9368                      | 0.93 (0.88; 0.97)   |

135  
136  
137  
138  
139  
140  
141  
142  
143  
144  
145  
146  
147  
148  
149

Hazard ratios and 95% confidence intervals were estimated by Cox proportional hazard model stratified by year of birth (5-year intervals) and using age as the time scale on a remaining median follow-up time of 18.9 (interquartile range 17.8 to 19.3) years for CVD events and 19.7 (interquartile range 18.9 to 19.8) years for all-cause mortality. Multivariable hazards ratios were adjusted for sex, race/ethnicity, depression, education, occupation and family history of cardiovascular disease at baseline. Missing CVH metrics and covariates were imputed by multiple imputation using fully conditional specification method under SAS MI procedure, n=10 imputations.

<sup>a</sup> Average number of CVD events and death (n) and people (N) in each category of change across 10 series of imputations, explaining the presence of decimals.

<sup>b</sup> People with same number of ideal metrics between baseline and 1997/99 (no change, i.e. difference in the number of ideal metrics=0) are the reference group.

<sup>c</sup> People with same cardiovascular health score between baseline and 1997/99 (no change, i.e. difference in the score=0) are the reference group.

HR stands for hazard ratio; CI for confidence interval; CVH for cardiovascular health; and CVD for cardiovascular disease.

150 **eTable 11. Change in the level of individual cardiovascular health metrics between 1985/88 and 1997/99**

| Pattern of change                            | Low-Low      | Low-Mod      | Low-High   | Mod-Low     | Mod-Mod      | Mod-High    | High-Low   | High-Mod     | High-High    |
|----------------------------------------------|--------------|--------------|------------|-------------|--------------|-------------|------------|--------------|--------------|
| <b>Cardiovascular health metric, No. (%)</b> |              |              |            |             |              |             |            |              |              |
| Smoking                                      | 652 (10.31)  | 52 (0.82)    | 276 (4.36) | 39 (0.62)   | 21 (0.33)    | 180 (2.85)  | 50 (0.79)  | 54 (0.85)    | 5002 (79.07) |
| Body mass index                              | 278 (4.39)   | 34 (0.54)    | 2 (0.03)   | 470 (7.43)  | 1322 (20.90) | 159 (2.51)  | 36 (0.57)  | 1259 (19.90) | 2766 (43.72) |
| Diet                                         | 2184 (34.52) | 3205 (50.66) | 210 (3.32) | 86 (1.36)   | 475 (7.51)   | 89 (1.41)   | 6 (0.09)   | 51 (0.81)    | 20 (0.32)    |
| Physical activity                            | 299 (4.73)   | 374 (5.91)   | 108 (1.71) | 356 (5.63)  | 2315 (36.60) | 911 (14.40) | 142 (2.24) | 1066 (16.85) | 755 (11.93)  |
| Blood pressure                               | 471 (7.45)   | 397 (6.28)   | 65 (1.03)  | 648 (10.24) | 1409 (22.27) | 780 (12.33) | 132 (2.09) | 861 (13.61)  | 1563 (24.71) |
| Total cholesterol                            | 1480 (23.40) | 585 (9.25)   | 54 (0.85)  | 823 (13.01) | 1372 (21.69) | 363 (21.69) | 113 (1.79) | 635 (10.04)  | 901 (14.24)  |
| Fasting glucose                              | 17 (0.27)    | 8 (0.13)     | 11 (0.17)  | -           | -            | -           | 140 (2,21) | 1128 (17,83) | 5022 (79,39) |

151 Low stands for low cardiovascular health; mod for moderate cardiovascular health; high for high cardiovascular health.

152  
153  
154

**eTable 12. Time-varying Cox proportional hazard models for the association between individual cardiovascular health metrics and incident cardiovascular disease and all-cause mortality**

|                                              | Incident cardiovascular disease |                     | All-cause mortality |                     |
|----------------------------------------------|---------------------------------|---------------------|---------------------|---------------------|
|                                              | n/N                             | Adjusted HR (95%CI) | n/N                 | Adjusted HR (95%CI) |
| <b>Level of cardiovascular health metric</b> |                                 |                     |                     |                     |
| Smoking                                      |                                 |                     |                     |                     |
| Poor                                         | 2052/9256                       | 1 (Ref)             | 1657/9256           | 1 (Ref)             |
| Intermediate                                 |                                 | 0.78 (0.62; 0.98)   |                     | 0.53 (0.42; 0.67)   |
| Ideal                                        |                                 | 0.60 (0.53; 0.67)   |                     | 0.39 (0.34; 0.44)   |
| Body mass index                              |                                 |                     |                     |                     |
| Poor                                         | 2052/9256                       | 1 (Ref)             | 1657/9256           | 1 (Ref)             |
| Intermediate                                 |                                 | 0.78 (0.69; 0.88)   |                     | 0.79 (0.69; 0.91)   |
| Ideal                                        |                                 | 0.63 (0.55; 0.71)   |                     | 0.92 (0.80; 1.05)   |
| Diet                                         |                                 |                     |                     |                     |
| Poor                                         | 2052/9256                       | 1 (Ref)             | 1657/9256           | 1 (Ref)             |
| Intermediate                                 |                                 | 0.90 (0.82; 0.99)   |                     | 0.76 (0.69; 0.84)   |
| Ideal                                        |                                 | 0.73 (0.57; 0.92)   |                     | 0.53 (0.41; 0.69)   |
| Physical activity                            |                                 |                     |                     |                     |
| Poor                                         | 2052/9256                       | 1 (Ref)             | 1657/9256           | 1 (Ref)             |
| Intermediate                                 |                                 | 0.83 (0.73; 0.95)   |                     | 0.60 (0.53; 0.68)   |
| Ideal                                        |                                 | 0.88 (0.77 ;1.01)   |                     | 0.55 (0.48; 0.64)   |
| Blood pressure                               |                                 |                     |                     |                     |
| Poor                                         | 2052/9256                       | 1 (Ref)             | 1657/9256           | 1 (Ref)             |
| Intermediate                                 |                                 | 0.74 (0.67; 0.82)   |                     | 0.82 (0.73; 0.92)   |
| Ideal                                        |                                 | 0.54 (0.47; 0.61)   |                     | 0.82 (0.71; 0.94)   |
| Total cholesterol                            |                                 |                     |                     |                     |
| Poor                                         | 2052/9256                       | 1 (Ref)             | 1657/9256           | 1 (Ref)             |
| Intermediate                                 |                                 | 0.77 (0.70; 0.85)   |                     | 0.81 (0.72; 0.91)   |
| Ideal                                        |                                 | 0.72 (0.64; 0.82)   |                     | 1.00 (0.87; 1.14)   |
| Fasting glucose                              |                                 |                     |                     |                     |
| Poor                                         | 2052/9256                       | 1 (Ref)             | 1657/9256           | 1 (Ref)             |
| Intermediate                                 |                                 | 0.63 (0.53; 0.76)   |                     | 0.60 (0.51; 0.71)   |
| Ideal                                        |                                 | 0.63 (0.53; 0.75)   |                     | 0.46 (0.39; 0.54)   |

155  
156  
157  
158  
159  
160

Hazard ratios and 95% confidence intervals were estimated by Cox proportional hazard models stratified by year of birth (5-year intervals) and using age as the time scale over a median follow-up of 29.5 (interquartile range 25.2 to 30.4) years for CVD and 30.2 (interquartile range 29.6 to 31.1) years for mortality starting from baseline.

<sup>a</sup>Each individual cardiovascular health metric was included as a time-varying variable. Hazards ratios were adjusted for sex, race/ethnicity, depression, education, occupation and family history of cardiovascular disease at baseline.

HR stands for hazard ratio; CI for confidence interval..



161  
162

**eTable 13. Association of change in the individual cardiovascular health metrics between 1985/88 and 1997/99 with subsequent incident cardiovascular disease events and all-cause mortality**

| Pattern of change | Low-Low                                                                                                            | Low-Mod              | Low-High             | Mod-Low              | Mod-Mod              | Mod-High             | High-Low             | High-Mod             | High-High            |
|-------------------|--------------------------------------------------------------------------------------------------------------------|----------------------|----------------------|----------------------|----------------------|----------------------|----------------------|----------------------|----------------------|
| <b>CVH metric</b> |                                                                                                                    |                      |                      |                      |                      |                      |                      |                      |                      |
|                   | <b>Adjusted<sup>a</sup> hazard ratios (95% confidence interval) for incident cardiovascular disease: 1114/6326</b> |                      |                      |                      |                      |                      |                      |                      |                      |
| Smoking           | 1 (Ref)                                                                                                            | 0.67<br>(0.36; 1.24) | 0.69 (0.50;<br>0.94) | 0.87<br>(0.45; 1.71) | 1.25<br>(0.58; 2.67) | 0.50<br>(0.34; 0.74) | 0.76<br>(0.39; 1.48) | 0.71<br>(0.39; 1.31) | 0.53<br>(0.44; 0.63) |
| Body mass index   | 1 (Ref)                                                                                                            | 0.64<br>(0.28; 1.47) | NA                   | 0.86<br>(0.62; 1.18) | 0.85<br>(0.65; 1.12) | 0.59<br>(0.38; 0.93) | 0.49<br>(0.15; 1.56) | 0.74<br>(0.56; 0.98) | 0.62<br>(0.47; 0.80) |
| Diet              | 1 (Ref)                                                                                                            | 0.85<br>(0.75; 0.97) | 0.98<br>(0.70; 1.36) | 1.07<br>(0.65; 1.76) | 0.93<br>(0.73; 1.18) | 0.93<br>(0.55; 1.56) | 1.19<br>(0.29; 4.78) | 0.98<br>(0.51; 1.90) | 0.77<br>(0.25; 2.40) |
| Physical activity | 1 (Ref)                                                                                                            | 0.78<br>(0.56; 1.11) | 0.94<br>(0.58; 1.52) | 1.09<br>(0.77; 1.55) | 0.76<br>(0.58; 1.01) | 0.80<br>(0.59; 1.08) | 1.07<br>(0.68; 1.69) | 0.94<br>(0.70; 1.25) | 0.91<br>(0.67; 1.25) |
| Blood pressure    | 1 (Ref)                                                                                                            | 0.95<br>(0.72; 1.24) | 0.50<br>(0.25; 1.03) | 0.96 (0.76;<br>1.21) | 0.77<br>(0.62; 0.96) | 0.57<br>(0.43; 0.74) | 0.96<br>(0.64; 1.45) | 0.75<br>(0.59; 0.95) | 0.56<br>(0.44; 0.70) |
| Total cholesterol | 1 (Ref)                                                                                                            | 0.76<br>(0.62; 0.94) | 0.33<br>(0.12; 0.88) | 0.88<br>(0.73; 1.06) | 0.75<br>(0.63; 0.88) | 0.55<br>(0.40; 0.75) | 0.53<br>(0.30; 0.94) | 0.71<br>(0.56; 0.90) | 0.66<br>(0.54; 0.82) |
| Fasting glucose   | 1 (Ref)                                                                                                            | 0.53<br>(0.14; 2.10) | 0.26<br>(0.06; 1.25) | -                    | -                    | -                    | 0.60<br>(0.29; 1.28) | 0.32<br>(0.16; 0.65) | 0.31<br>(0.15; 0.62) |
|                   | <b>Adjusted<sup>a</sup> hazard ratios (95% confidence interval) for all-cause mortality: 846/6326</b>              |                      |                      |                      |                      |                      |                      |                      |                      |
| Smoking           | 1 (Ref)                                                                                                            | 0.64<br>(0.34; 1.22) | 0.65<br>(0.47; 0.88) | 0.76<br>(0.36; 1.63) | 0.27<br>(0.07; 1.08) | 0.34<br>(0.21; 0.55) | 1.01<br>(0.53; 1.91) | 0.43<br>(0.19; 0.98) | 0.37<br>(0.61; 0.44) |
| Body mass index   | 1 (Ref)                                                                                                            | 0.89<br>(0.40; 1.95) | NA                   | 0.73<br>(0.51; 1.04) | 0.69<br>(0.52; 0.93) | 0.94<br>(0.62; 1.43) | 0.81<br>(0.33; 2.04) | 0.56<br>(0.41; 0.76) | 0.59<br>(0.44; 0.78) |
| Diet              | 1 (Ref)                                                                                                            | 0.91<br>(0.78; 1.05) | 0.75<br>(0.50; 1.14) | 1.45<br>(0.89; 2.37) | 0.74<br>(0.55; 1.00) | 0.67<br>(0.35; 1.31) | NA                   | 0.75<br>(0.34; 1.69) | 1.24<br>(0.46; 3.35) |
| Physical activity | 1 (Ref)                                                                                                            | 0.75<br>(0.52; 1.07) | 0.43<br>(0.22; 0.82) | 1.18<br>(0.82; 1.70) | 0.72<br>(0.53; 0.96) | 0.64<br>(0.46; 0.90) | 0.77<br>(0.46; 1.29) | 0.61<br>(0.44; 0.84) | 0.67<br>(0.48; 0.94) |
| Blood pressure    | 1 (Ref)                                                                                                            | 1.06<br>(0.77; 1.45) | 1.02<br>(0.53; 1.97) | 1.03<br>(0.78; 1.36) | 0.92<br>(0.71; 1.18) | 0.77<br>(0.57; 1.05) | 1.05<br>(0.64; 1.71) | 0.78<br>(0.58; 1.03) | 0.79<br>(0.61; 1.04) |
| Total cholesterol | 1 (Ref)                                                                                                            | 0.81<br>(0.63; 1.03) | 1.61<br>(0.92; 2.82) | 0.93<br>(0.74; 1.18) | 0.87<br>(0.71; 1.06) | 1.21<br>(0.92; 1.60) | 0.20<br>(0.06; 0.62) | 1.01<br>(0.77; 1.31) | 1.01<br>(0.80; 1.29) |
| Fasting glucose   | 1 (Ref)                                                                                                            | 0.46<br>(0.05; 4.24) | 0.51<br>(0.06; 4.62) | -                    | -                    | -                    | 1.56<br>(0.56; 4.36) | 0.76<br>(0.28; 2.06) | 0.64<br>(0.24; 1.72) |

163  
164  
165  
166  
167

Hazard ratios and 95% confidence intervals were estimated by Cox proportional hazard model stratified by year of birth (5-year intervals) and using age as the time scale. The follow-up of CVD events and mortality starts after 1997/99 and the median duration is 18.9 (interquartile range 17.8 to 19.3) years for CVD events and 19.7 (interquartile range 18.9 to 19.8) years for all-cause mortality. Participants with no change in the number of ideal metrics served as the reference category. <sup>a</sup>Adjusted for sex, race/ethnicity, depression, education, occupation and family history of cardiovascular disease at baseline. CVH stands for cardiovascular health; low stands for low cardiovascular health; mod for moderate cardiovascular health; high for high cardiovascular health; and CVD for cardiovascular disease.

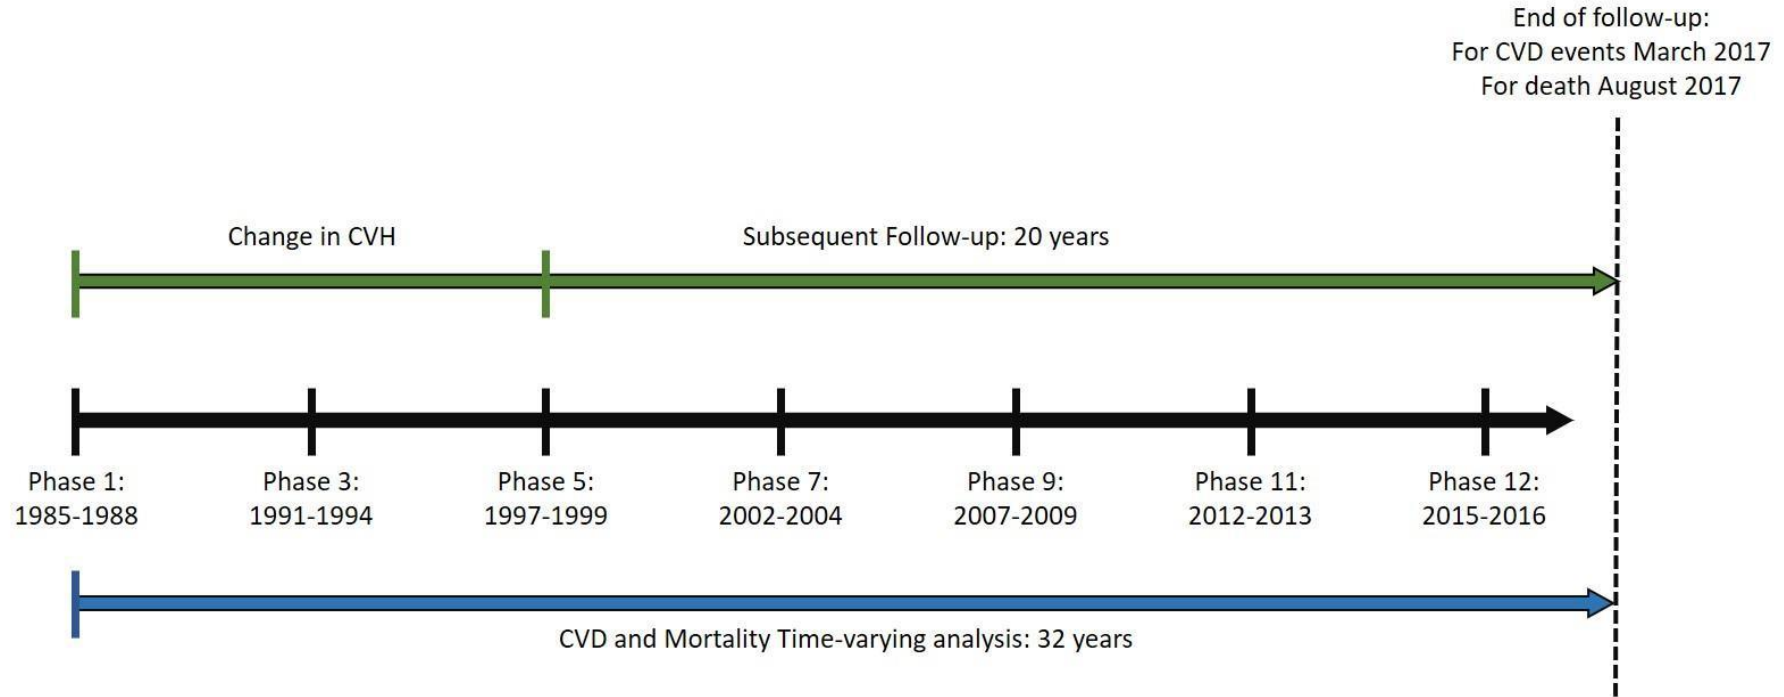

168  
169

**eFigure 1. Summary of the statistical analysis design**

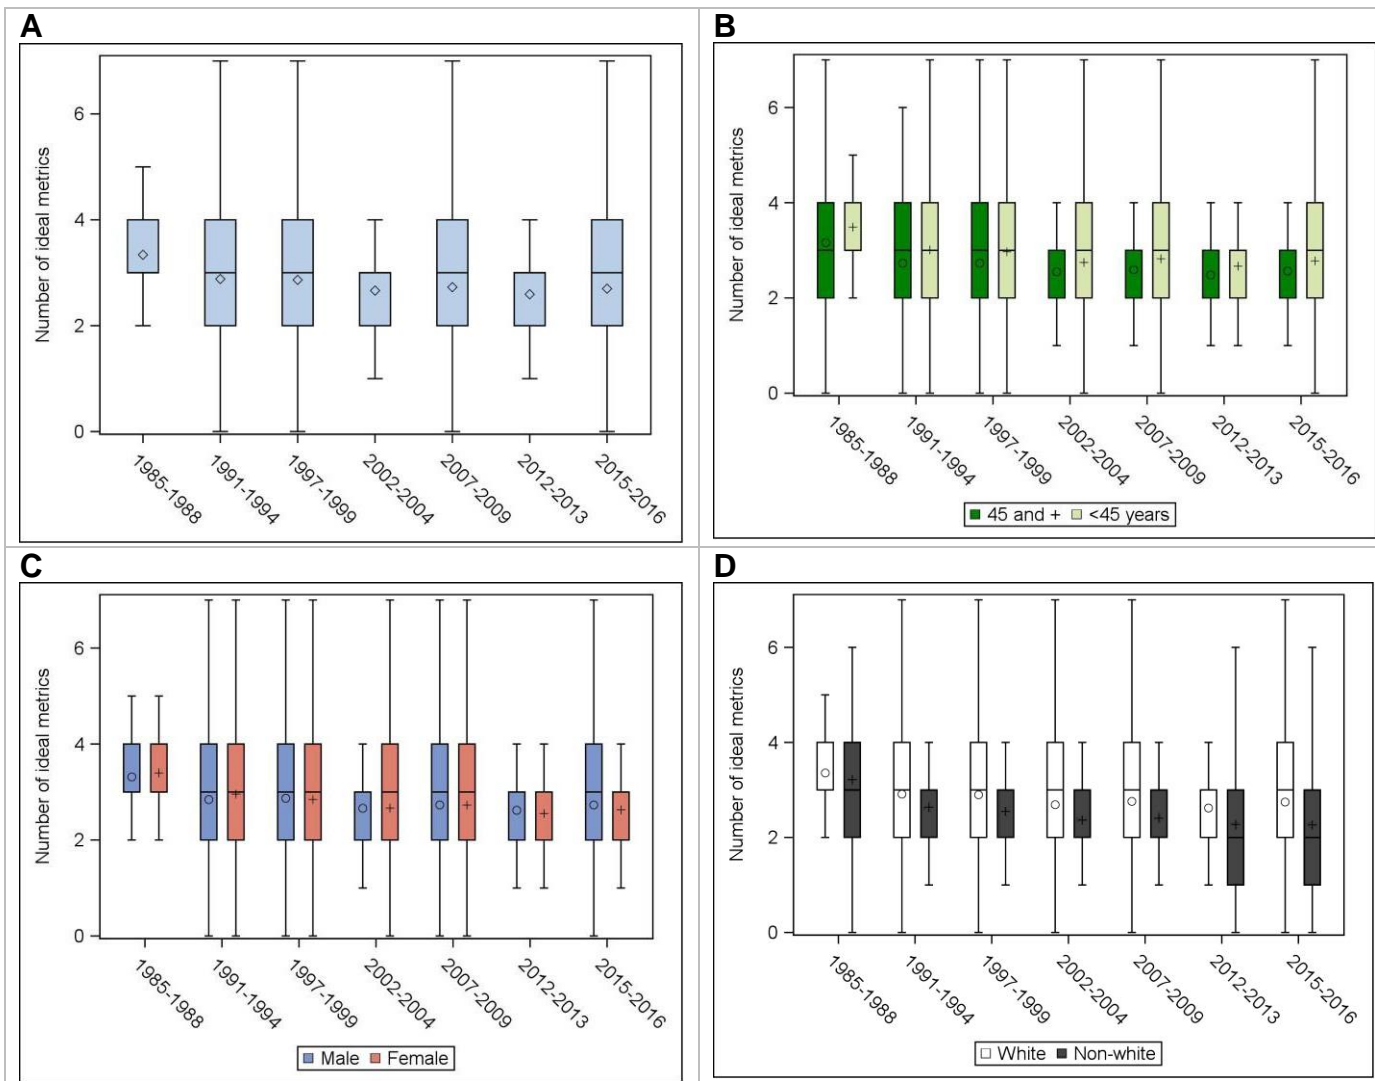

170 eFigure 2. Distribution of the number of ideal metrics at each phase in the whole population (A), by age group (B), by sex  
 171 (C) and in white versus non-white participants (D)

**A**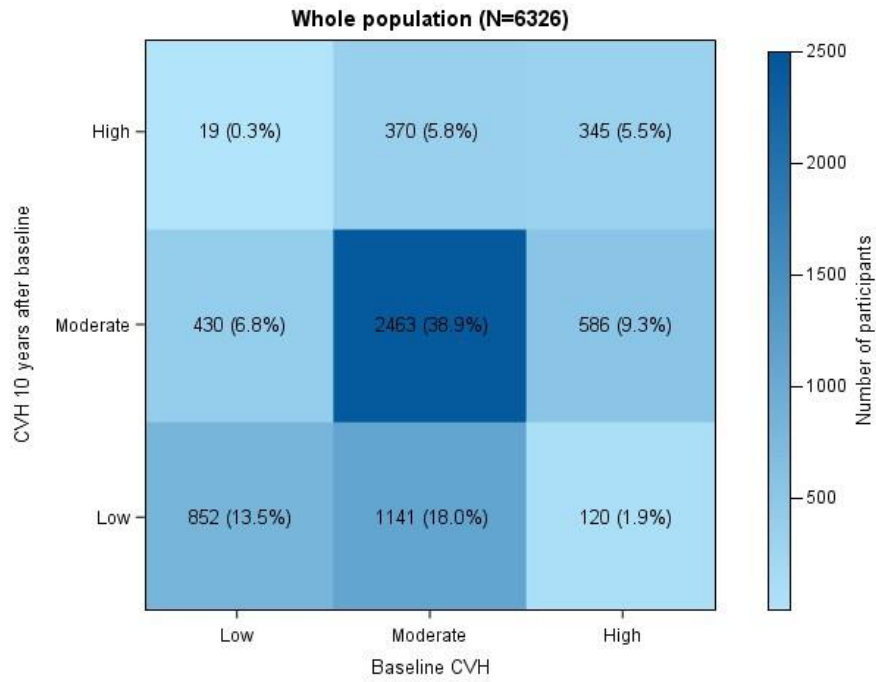**B**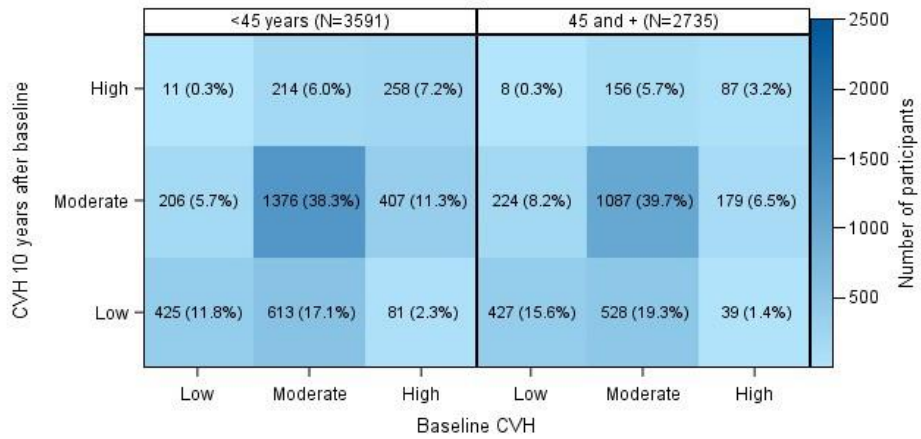

C

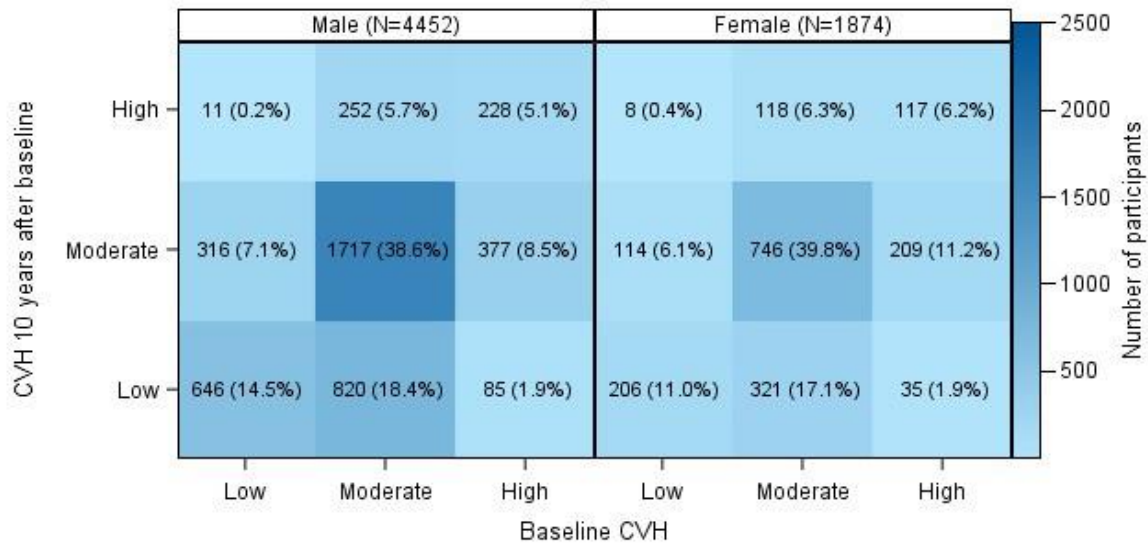

172  
173  
174  
175  
176

D

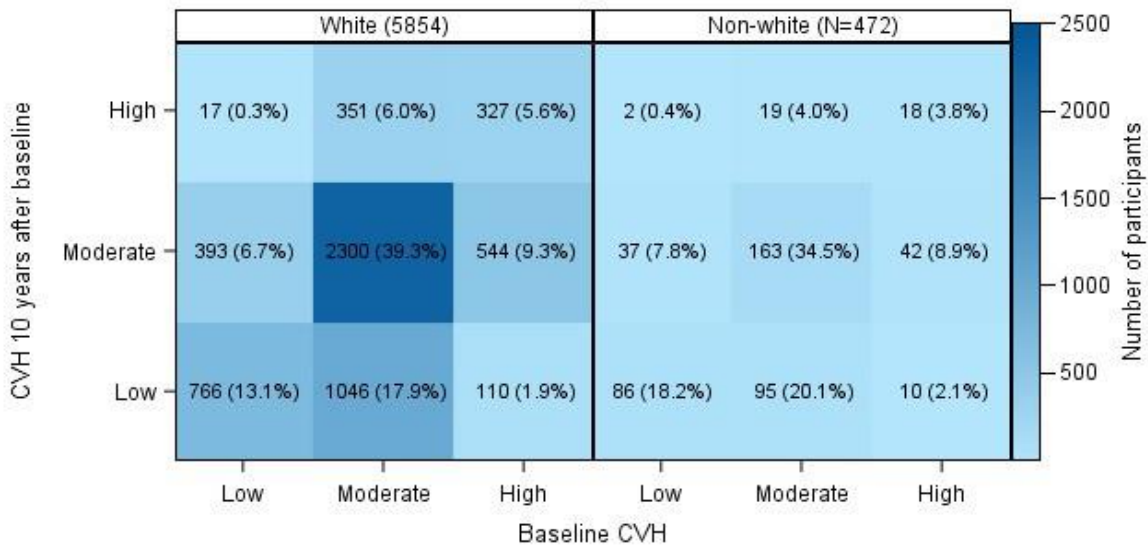

**eFigure 3. Distribution of the change in cardiovascular health between 1985/88 and 1997/99 in the total study population (n=6326) (A), in individuals aged <45 (n=3591) and ≥45 years (n=2735) (B), in women (n=1874) and men (n=4452) (C) and in white (n=5854) versus non-white participants (n=472) (D)**

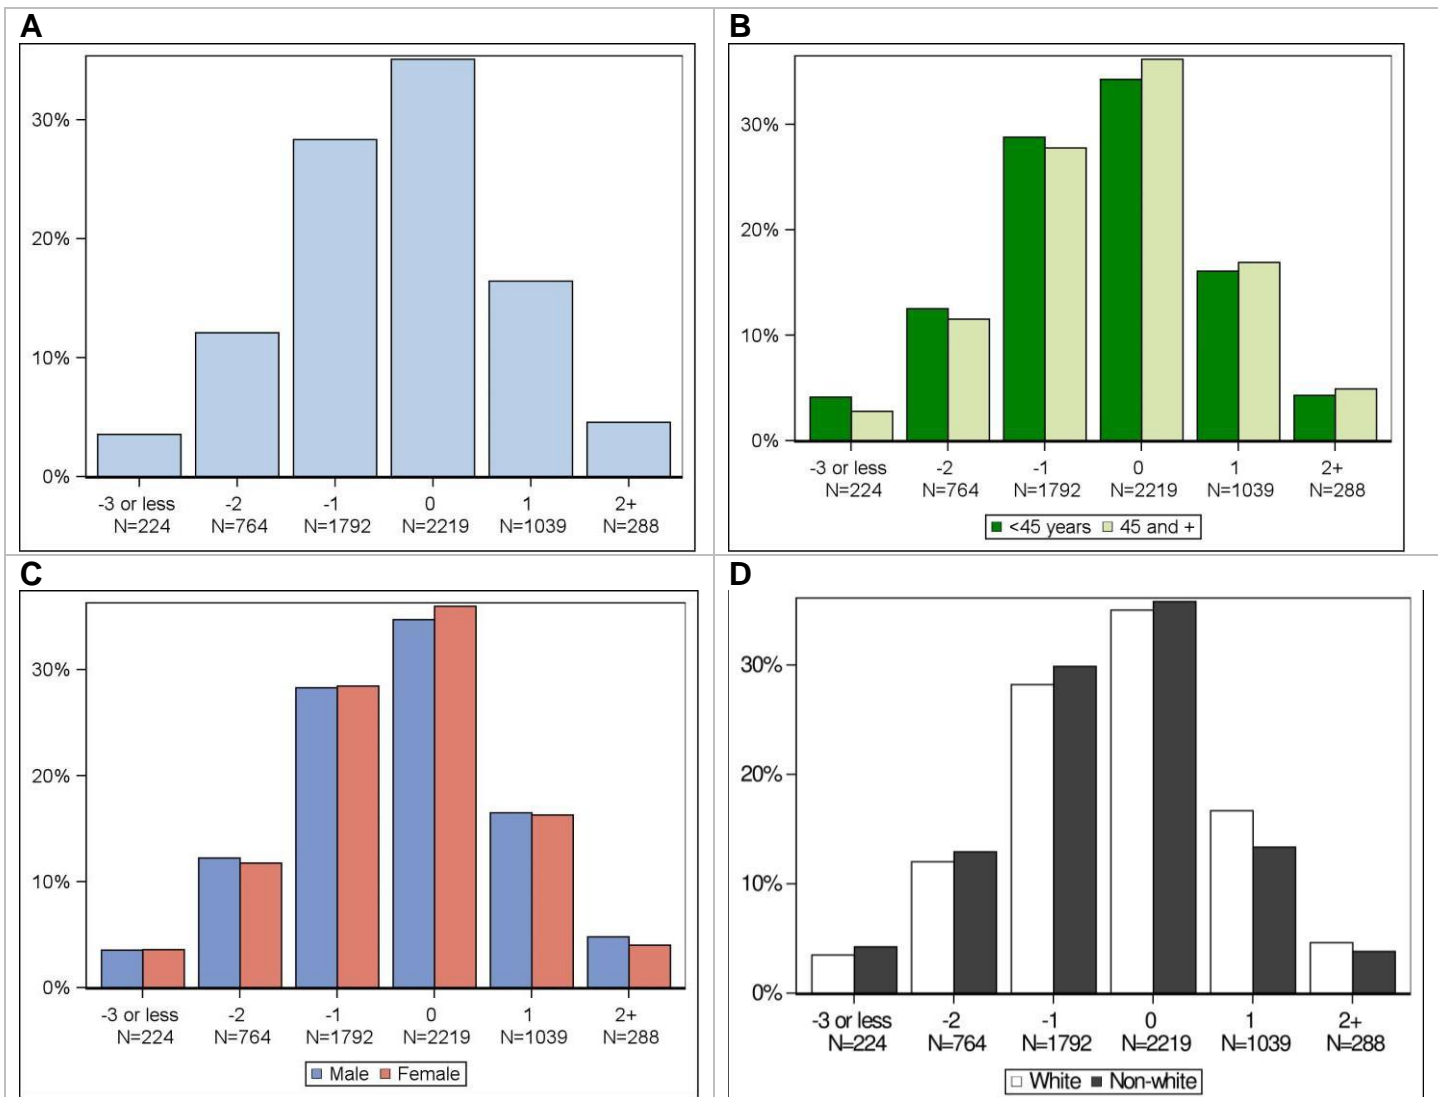

177 **eFigure 4. Distribution of the change in the number of ideal cardiovascular health metrics between 1985/88 and 1997/99 in**  
 178 **the total study population (n=6326) (A), in individuals aged <45 (n=3591) and ≥45 years (n=2735) (B), in women (n=1874)**  
 179 **and men (n=4452) (C) and in white (n=5854) versus non-white participants (n=472) (D)**

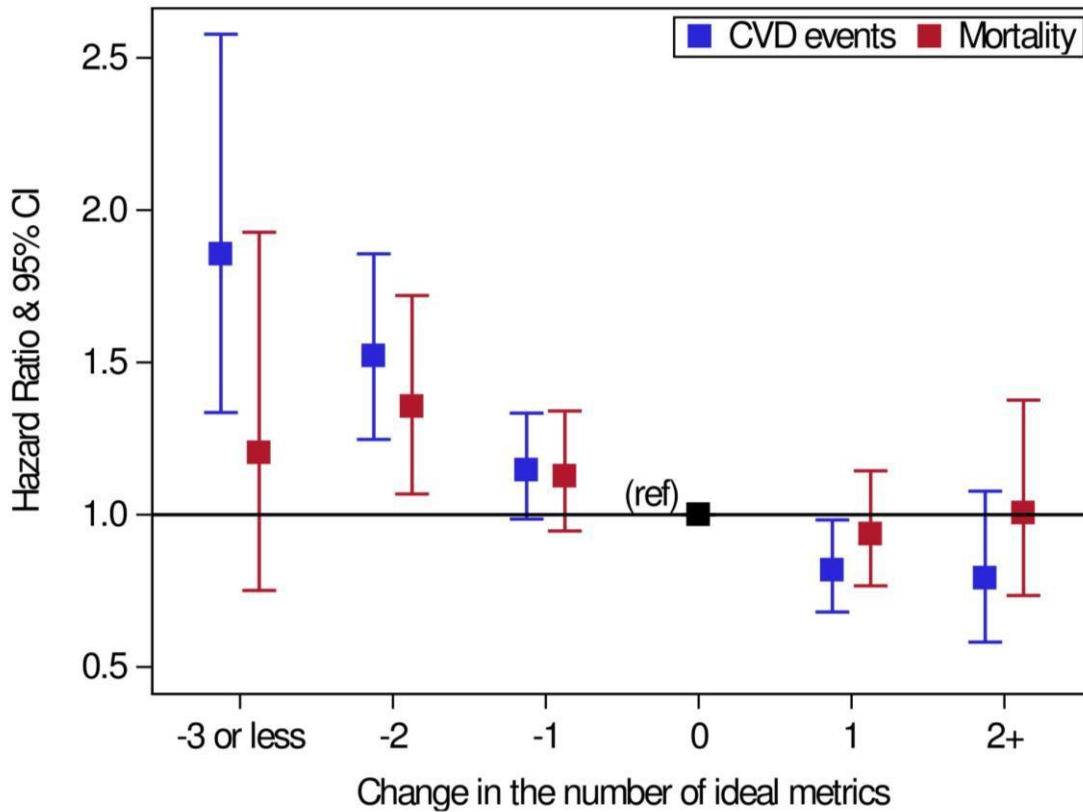

180  
181  
182  
183  
184  
185  
186  
187  
188  
189  
190

**eFigure 5. Hazards ratios of incident cardiovascular disease and for all-cause mortality for change in the number of ideal metrics between 1985/88 and 1997/99.**

Hazard ratios and 95% confidence intervals were estimated by Cox proportional hazard model stratified by year of birth (5-year intervals) and using age as the time scale. The remaining median follow-up time after 1997/99 was 18.9 (interquartile range 17.8 to 19.3) years for CVD events and 19.7 (interquartile range 18.9 to 19.8) years for all-cause mortality. Subjects with no change in the number of ideal metrics served as the reference category. Multivariable hazards ratios were adjusted for sex, race/ethnicity, depression, education, occupation, family history of cardiovascular disease at baseline and number of ideal metrics at baseline.

CVD stands for cardiovascular disease; CI for confidence intervals

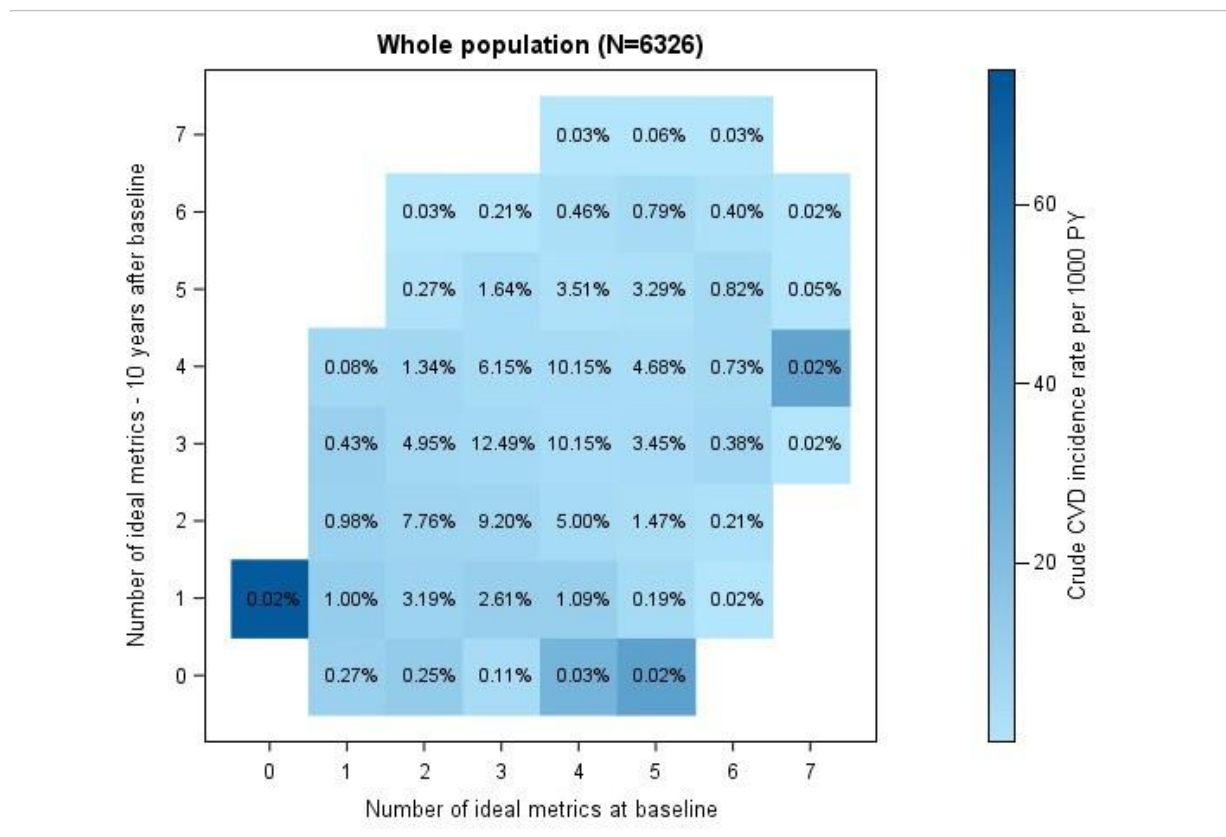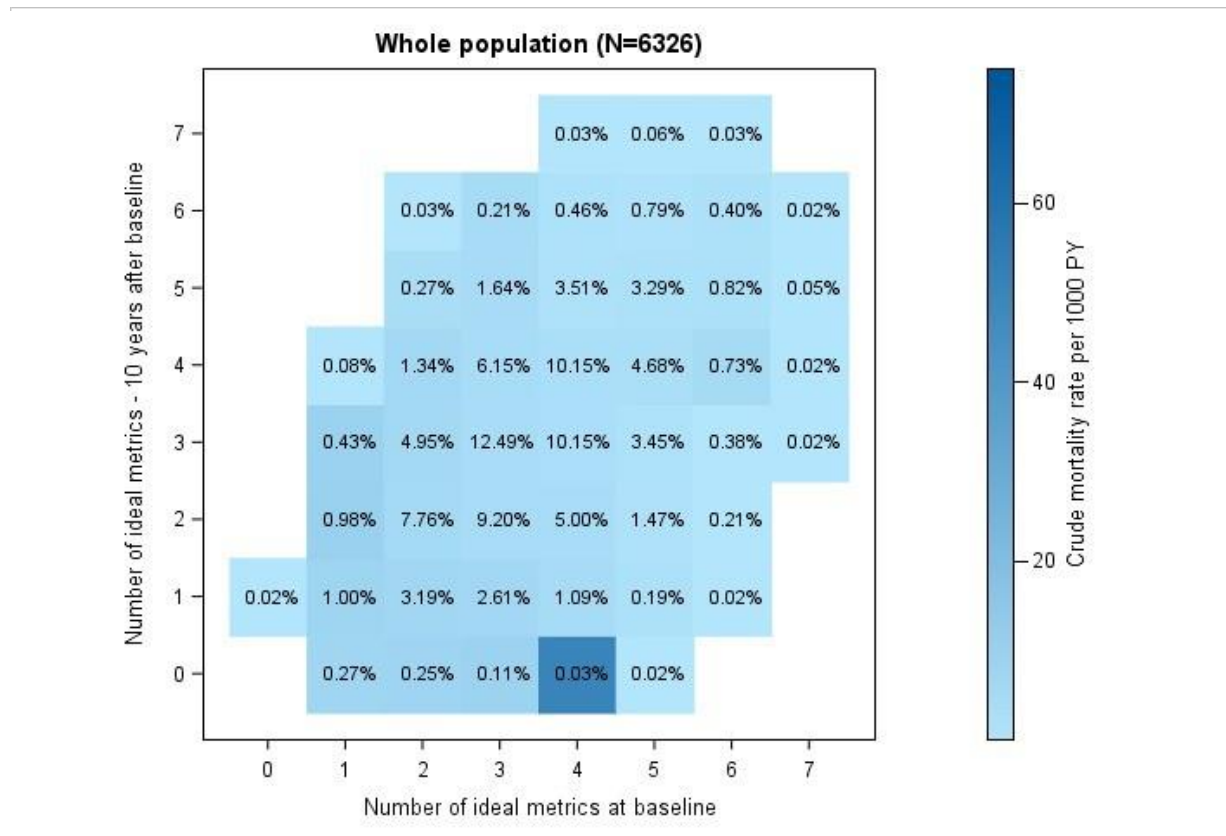

191 **eFigure 6. Heatmap of unadjusted incidence rates of cardiovascular disease**  
 192 **(A) and all-cause mortality (B) by change in the number of ideal health metrics**  
 193 **between 1985/88 and 1997/99 in the total study population (n=6236).**

194 The median follow-up time for cardiovascular disease after 1997/99 was 18.9 (interquartile range 17.8 to 19.3) years and 19.7  
 195 (interquartile range 18.9 to 19.8) years for mortality. CVH stands for cardiovascular health; CVD for cardiovascular disease; PY  
 196 for person-years

197



198 **References**

- 199 1. Richardson MT, Leon AS, Jacobs DR, Jr., Ainsworth BE, Serfass R.  
200 Comprehensive evaluation of the Minnesota Leisure Time Physical Activity  
201 Questionnaire. *J Clin Epidemiol.* 1994;47(3):271-281.
- 202 2. Sabia S, Dugravot A, Dartigues JF, et al. Physical activity, cognitive decline,  
203 and risk of dementia: 28 year follow-up of Whitehall II cohort study. *BMJ.*  
204 2017;357:j2709.
- 205 3. Brunner E, Stallone D, Juneja M, Bingham S, Marmot M. Dietary assessment  
206 in Whitehall II: comparison of 7 d diet diary and food-frequency questionnaire  
207 and validity against biomarkers. *Br J Nutr.* 2001;86(3):405-414.
- 208 4. Joint Formulary Committee British national formulary, 32th edition. London,  
209 United Kingdom: BMJ Group and Pharmaceutical Press; 1996.
- 210 5. Stansfeld SA, Marmot MG. Social class and minor psychiatric disorder in  
211 British Civil Servants: a validated screening survey using the General Health  
212 Questionnaire. *Psychol Med.* 1992;22:739-49.
- 213 6. Fine JP, Gray RJ. A proportional hazards model for the subdistribution of  
214 competing risks in survival analysis. *J Am Stat Assoc.* 1999;94:496–509.
- 215 7. Enserro DM, Vasani RS, Xanthakis V. Twenty-Year Trends in the American  
216 Heart Association Cardiovascular Health Score and Impact on Subclinical and  
217 Clinical Cardiovascular Disease: The Framingham Offspring Study. *J Am*  
218 *Heart Assoc.* 2018;7(11).
- 219
